# Supplementary material
Source: publisher figshare collection journal article supplement (https://karger.figshare.com/articles/dataset/_/5241256)
Supplement: Supplementary file 1 [file 1]

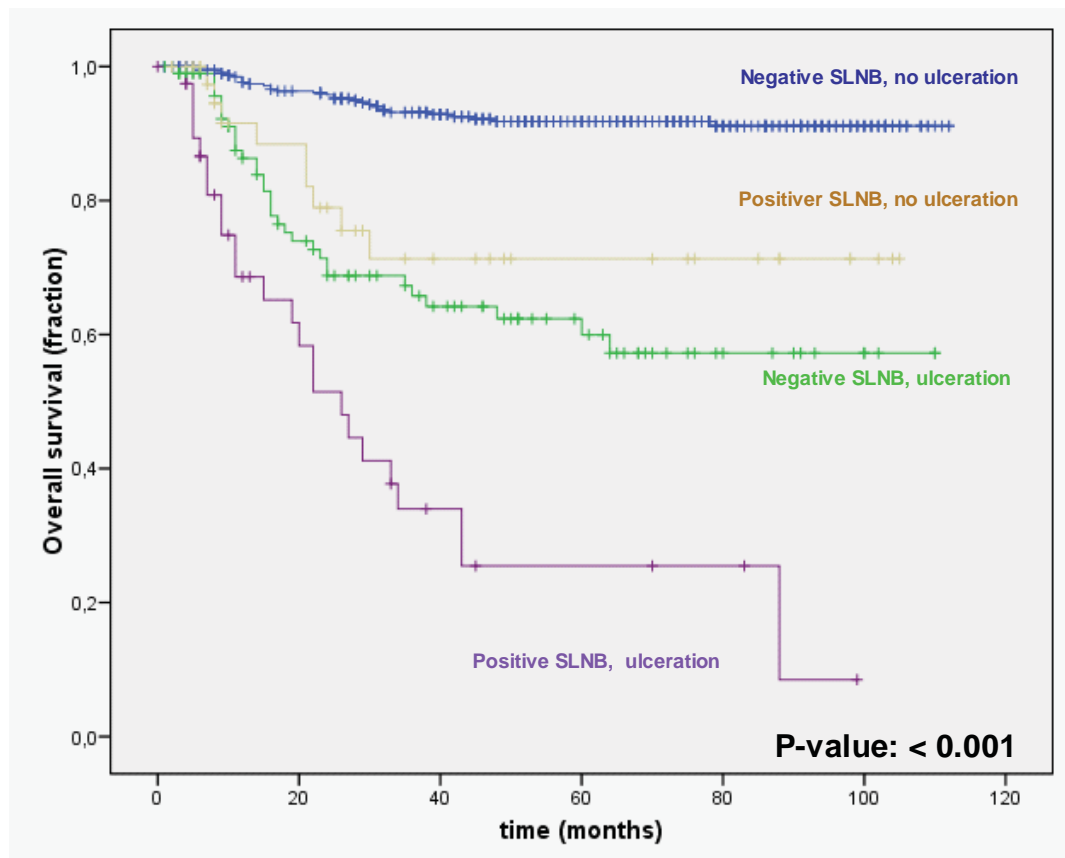

|                                |     |     |     |     |     |    |   |
|--------------------------------|-----|-----|-----|-----|-----|----|---|
| negative SLNB<br>no ulceration | 424 | 366 | 301 | 213 | 136 | 43 | 0 |
| negative SLNB<br>ulceration    | 100 | 77  | 47  | 28  | 10  | 5  | 0 |
| Positive SLNB<br>no ulceration | 45  | 28  | 18  | 13  | 9   | 4  | 0 |
| positive SLNB<br>ulceration    | 40  | 22  | 12  | 5   | 3   | 0  | 0 |

Suppl. fig. 1. Overall survival according to the combination of SLN status and ulceration in the whole cohort.
