# Supplementary material
Source: publisher figshare collection journal article supplement (https://karger.figshare.com/articles/dataset/_/5241256)
Supplement: Supplementary file 2 [file 1]

## Supplemental tables

**Supplemental Table 1: Characteristics of SLN positive and negative patients (n=664)**

| Parameter         |                 | positive SLNB<br>n=86 (13.0%) | negative SLNB<br>n=578 (87.0%) | p-value      |
|-------------------|-----------------|-------------------------------|--------------------------------|--------------|
| Gender            | Male            | 50 (58.1%)                    | 263 (45.5%)                    | <b>0.028</b> |
|                   | Female          | 36 (41.9%)                    | 315 (54.5%)                    |              |
| Age               | Mean            | 56.31 +/- 13.9                | 57.60 +/- 14.9                 | 0.478.       |
|                   |                 |                               |                                |              |
| Location          | Head/Neck       | 6 (7.1%)                      | 53 (9.7%)                      | 0.541.       |
|                   | Upper Extremity | 14 (16.5%)                    | 98 (17.9%)                     |              |
|                   | Trunk           | 36 (42.4%)                    | 215 (39.2%)                    |              |
|                   | Lower Extremity | 28 (32.9%)                    | 181 (33.0%)                    |              |
|                   | Mucous membrane | 1 (1.2%)                      | 1 (0.2%)                       |              |
|                   |                 |                               |                                |              |
| Subtype           | SSM             | 34 (40.5%)                    | 206 (39.2%)                    | 0.146.       |
|                   | LMM             | 1 (1.2%)                      | 23 (4.4%)                      |              |
|                   | NMM             | 27 (32.1%)                    | 136 (25.9%)                    |              |
|                   | ALM             | 9 (10.7%)                     | 35 (6.7%)                      |              |
|                   | Other           | 13 (15.5%)                    | 125 (23.8%)                    |              |
|                   |                 |                               |                                |              |
| Breslow thickness | < 1mm           | 6 (7.2%)                      | 213 (37.4%)                    | <b>0.001</b> |
|                   | 1.01-2 mm       | 17 (20.5%)                    | 191 (33.5%)                    |              |
|                   | 2.01-4.0 mm     | 34 (41.0%)                    | 105 (18.4%)                    | <b>0.001</b> |
|                   | > 4.01mm        | 26 (31.3%)                    | 61 (10.7%)                     |              |
|                   | mean            | 3.59 ± 2.39                   | 1.98 ± 2.12                    |              |
|                   |                 |                               |                                |              |
| Clark Level       | I               | 0 (0%)                        | 2 (0.3%)                       | <b>0.001</b> |
|                   | II              | 2 (2.3%)                      | 30 (5.2%)                      |              |
|                   | III             | 17 (19.8%)                    | 255 (44.4%)                    |              |
|                   | IV              | 52 (60.5%)                    | 256 (44.6%)                    |              |
|                   | V               | 15 (16.3%)                    | 30 (5.2%)                      |              |
|                   |                 |                               |                                |              |
| Ulceration        | No              | 46 (53.5%)                    | 467 (80.9%)                    | <b>0.001</b> |
|                   | Yes             | 40 (46.5%)                    | 110 (19.1%)                    |              |
| Regression        | No              | 82 (95.3%)                    | 551 (95.5%)                    | 0.952.       |
|                   | Yes             | 4 (4.7%)                      | 26 (4.5%)                      |              |
| Progress          | No              | 51 (60.0%)                    | 511(88.6%)                     | <b>0.001</b> |
|                   | Yes             | 34 (40.0%)                    | 66 (11.4%)                     |              |

n= numbers

**Supplemental Table 2: Uni- and multivariate Cox regression of risk factors in Stage II (T4 N0 M0) patients for recurrence-free survival (T4)**

|                   | univariate               |              | multivariate             |              |
|-------------------|--------------------------|--------------|--------------------------|--------------|
|                   | recurrence-free survival |              | recurrence-free survival |              |
|                   | Hazard ratio(95% CI)     | p-value      | Hazard ratio(95% CI)     | p-value      |
| Ulceration        | 2.571 (1.028 – 6.431)    | <b>0.043</b> | 2.738 (1.077 – 6.961)    | <b>0.034</b> |
| Clark Level       | 1.134 (0.574 – 2.241)    | 0.717        |                          | eliminated   |
| Breslow thickness | 1.072 (0.973 – 1.180)    | 0.153        | 1.150 (1.023 – 1.292)    | <b>0.019</b> |
| Age               | 1.020 (0.992 – 1.049)    | 0.162        |                          | eliminated   |
| Site of melanoma  | 0.853 (0.584 – 1.244)    | 0.407        | 0.899 (0.809 – 0.999)    | <b>0.047</b> |
| Melanoma Subtyp   | 1.047 (0.766 – 1.432)    | 0.772        |                          | eliminated   |
| Regression        | 1.153 (0.156 – 8.533)    | 0.889        |                          | eliminated   |
| Gender            | 1.020 (0.932 – 1.049)    | 0.161        |                          | eliminated   |

**Supplemental Table 3: Uni- and multivariate Cox regression of risk factors in Stage II (T4 N0 M0) patients for overall survival (T4)**

|                   | univariate             |              | multivariate          |              |
|-------------------|------------------------|--------------|-----------------------|--------------|
|                   | overall survival       |              | overall survival      |              |
|                   | Hazard ratio(95% CI)   | p-value      | Hazard ratio(95% CI)  | p-value      |
| Ulceration        | 3.087 (1.024 – 9.313)  | <b>0.045</b> |                       | eliminated   |
| Clark Level       | 0.937 (0.437 – 2.010)  | 0.867        |                       | eliminated   |
| Breslow thickness | 1.020 (0.896 – 1.160)  | 0.766        |                       | eliminated   |
| Age               | 1.043 (1.003 – 1.884)  | <b>0.033</b> | 1,048 (1,066 – 1,092) | <b>0.026</b> |
| Site of melanoma  | 1.304 (0.797 – 2.134)  | 0.290        |                       | eliminated   |
| Melanoma Subtyp   | 1.015 (0.717 – 1.438)  | 0.933        |                       | eliminated   |
| Regression        | 1.479 (0.197 – 11.091) | 0.703        |                       | eliminated   |
| Gender            | 0.843 (0.344 – 2.068)  | 0.709        |                       | eliminated   |

**Supplemental Table 4: Uni- and multivariate Cox regression of risk factors in Stage III (T4 N1/2 M0) patients for recurrence-free survival (T4)**

|                             | univariate               |            | multivariate             |              |
|-----------------------------|--------------------------|------------|--------------------------|--------------|
|                             | recurrence-free survival |            | recurrence-free survival |              |
|                             | Hazard ratio(95% CI)     | p-value    | Hazard ratio(95% CI)     | p-value      |
| Ulceration                  | 0.538 (0.063 – 4.612)    | 0.565      |                          | eliminated   |
| Clark Level                 | 1.665 (0.618 – 4.480)    | 0.308      |                          | eliminated   |
| Breslow thickness           | 1.060 (0.784 – 1.435)    | 0.703      |                          | eliminated   |
| Age                         | 0.993 (0.944 – 1.043)    | 0.769      |                          | eliminated   |
| SLN Micro-, Macrometastasis | 0.958 (0.776 – 1.182)    | 0.449      |                          | eliminated   |
| Site of melanoma            | 0.518 (0.291 – 0.922)    | 0.025      | 0.517 (0.289 – 0.927)    | <b>0.027</b> |
| Melanoma Subtyp             | 1.014 (0.602 – 1.708)    | 0.958      |                          | eliminated   |
| Regression                  |                          | eliminated |                          | eliminated   |
| Gender                      | 1.097 (0.379 – 3.175)    | 0.864      |                          | eliminated   |

**Supplemental Table 5: Uni- and multivariate Cox regression of risk factors in Stage III (T4 N1/2 M0) patients for overall survival (T4)**

|                             | univariate               |            | multivariate         |            |
|-----------------------------|--------------------------|------------|----------------------|------------|
|                             | recurrence-free survival |            | overall survival     |            |
|                             | Hazard ratio(95% CI)     | p-value    | Hazard ratio(95% CI) | p-value    |
| Ulceration                  |                          | eliminated |                      | eliminated |
| Clark Level                 | 1.548 (0.536 – 4.473)    | 0.416      |                      | eliminated |
| Breslow thickness           | 1.104 (0.810 – 1.504)    | 0.531      |                      | eliminated |
| Age                         | 1.028 (0.967 – 1.092)    | 0.377      |                      | eliminated |
| SLN Micro-, Macrometastasis | 1.018 (0.994 – 1.042)    | 0.097      |                      | eliminated |
| Site of melanoma            | 0.564 (0.316 – 1.009)    | 0.053      |                      | eliminated |
| Melanoma Subtyp             | 0.933 (0.510 – 1.707)    | 0.823      |                      | eliminated |
| Regression                  |                          | eliminated |                      | eliminated |
| Gender                      | 1.028 (0.967 – 1.092)    | 0.375      |                      | eliminated |

**Supplemental Table 6: Uni- and multivariate Cox regression of risk factors for recurrence-free survival (whole cohort)**

|                            | univariate               |              | multivariate             |              |
|----------------------------|--------------------------|--------------|--------------------------|--------------|
|                            | recurrence-free survival |              | recurrence-free survival |              |
|                            | Hazard ratio(95% CI)     | p-value      | Hazard ratio(95% CI)     | p-value      |
| Sentinel lymph node status | 5.095 (3.363 – 7.720))   | <b>0.001</b> | 2.673 (1.705 – 4.191)    | <b>0.001</b> |
| Ulceration                 | 7.189 (4.806 - 10.753)   | <b>0.001</b> | 2.679 (1.664 – 4.131)    | <b>0.001</b> |
| Clark Level                | 3.450 (2.562 - 4.645)    | <b>0.001</b> | 1.664 (1.140 – 2.430)    | <b>0.008</b> |
| Breslow thickness          | 1.253 (1.207 - 1.301)    | <b>0.001</b> | 1.153 (1.074 - 1.238)    | <b>0.001</b> |
| Age                        | 1.028 (1.012 - 1.043)    | <b>0.001</b> |                          | eliminated   |
| SL Micro-, Macrometastasis | 0.990 (0.924 – 1.062)    | 0.787        |                          |              |
| Site of melanoma           | 0.977 (0.931 – 1.027)    | 0.363        |                          |              |
| Melanoma Subtyp            | 1.077 (0.954 – 1.217)    | 0.231        |                          |              |
| Regression                 | 0.564 (0.139 – 2.286)    | 0.422        |                          |              |
| Gender                     | 0.517 (0.346 - 0.774)    | <b>0.001</b> |                          | eliminated   |

**Supplemental Table 7: Uni- and multivariate Cox regression of risk factors for overall survival (whole cohort)**

|                             | univariate             |              | multivariate          |              |
|-----------------------------|------------------------|--------------|-----------------------|--------------|
|                             | overall survival       |              | overall survival      |              |
|                             | Hazard ratio(95% CI)   | p-value      | Hazard ratio(95% CI)  | p-value      |
| Sentinel lymph node status  | 4.846 (3.078 – 7.629)  | <b>0.001</b> | 3.096 (1.885 - 5.038) | <b>0.001</b> |
| Ulceration                  | 6.476 (4.195 – 10.000) | <b>0.001</b> | 2.329 (1.371 – 3.955) | <b>0.002</b> |
| Clark Level                 | 2.904 (2.124 – 3.970)  | <b>0.001</b> | 1.585 (1.054 – 2.382) | <b>0.007</b> |
| Breslow thickness           | 1.222 (1.170 – 1.276)  | <b>0.001</b> |                       | eliminated.  |
| Age                         | 1.045 (1.027 – 1.064)  | <b>0.001</b> | 1.039 (1.017 -1.058)  | <b>0.001</b> |
| SLN Micro-, Macrometastasis | 1.024 (1.003 – 1.046)  | <b>0.024</b> |                       | eliminated.  |
| Site of melanoma            | 0.995 (0.788 – 1.256)  | 0.967.       |                       |              |
| Melanoma Subtyp             | 1.100 (0.965 – 1.254)  | 0.153        |                       |              |
| Regression                  | 1.069 (0.338 – 3.385)  | 0.909        |                       |              |
| Gender                      | 0.470 (0.303 - 0.729)  | <b>0.001</b> | 0.563 (0.359- 0.833)  | <b>0.012</b> |
