# Supplementary material
Source: publisher figshare collection journal article supplement (https://karger.figshare.com/articles/dataset/_/5241256)
Supplement: Supplementary file 3 [file 1]

## Erratum

---

In the article by Göppner et al. [2011;222:59–66], it should be noted that D. Göppner and J. Ulrich contributed equally to the work.
